# Supplementary material for: CD28 hinge used in chimeric antigen receptor (CAR) T-cells exhibits local structure and conformational exchange amidst global disorder
Source: Commun Biol. 2024 Aug 31;7:1072. doi: 10.1038/s42003-024-06770-w (PMC11365992; doi:10.1038/s42003-024-06770-w)
Supplement: Supplementary file 4 — Supplementary Data 1 [file 42003_2024_6770_MOESM4_ESM.xlsx]

## Sheet: Figure 1e
Figure 1e
																liquid chromatography-mass spectrometry (LC-MS) data
Chromatogram from size exclusion chromatography of 15N-labeled CD28H following injection onto an FPLC system equipped with a Superdex 75pg column.
Elution volume (mL)	UV(mAU)
40.162	0.957806
40.408	0.941698
40.655	0.94478
40.901	0.919505
41.148	0.920372
41.394	0.923359
41.641	0.948429
41.887	0.957286
42.134	0.978197
42.38	0.983046
42.627	1.00904
42.873	1.04931
43.12	1.07179
43.366	1.1377
43.613	1.176
43.859	1.23762
44.106	1.28911
44.352	1.34607
44.599	1.3856
44.845	1.43573
45.092	1.48568
45.338	1.50559
45.585	1.52578
45.831	1.54398
46.077	1.57132
46.324	1.59605
46.57	1.61178
46.817	1.64879
47.063	1.73837
47.31	1.83152
47.556	1.93856
47.803	2.10789
48.049	2.25269
48.296	2.41268
48.542	2.55025
48.789	2.63446
49.035	2.69398
49.282	2.70081
49.528	2.64726
49.775	2.54773
50.021	2.4393
50.268	2.28598
50.514	2.15395
50.761	1.99696
51.007	1.88246
51.254	1.79207
51.5	1.69259
51.747	1.61709
51.993	1.54929
52.24	1.50924
52.486	1.48447
52.733	1.43489
52.979	1.44108
53.225	1.41184
53.472	1.41333
53.718	1.4169
53.965	1.41826
54.211	1.40958
54.458	1.40867
54.704	1.38082
54.951	1.38761
55.197	1.38445
55.444	1.42171
55.69	1.42455
55.937	1.46472
56.183	1.46883
56.43	1.49378
56.676	1.50688
56.923	1.49618
57.169	1.47769
57.416	1.46843
57.662	1.42224
57.909	1.42313
58.155	1.40238
58.402	1.37569
58.648	1.34745
58.895	1.34237
59.141	1.31437
59.388	1.29686
59.634	1.27994
59.881	1.26871
60.127	1.27233
60.374	1.24619
60.62	1.24533
60.866	1.25348
61.113	1.26312
61.359	1.2629
61.606	1.2769
61.852	1.26781
62.099	1.2697
62.345	1.26361
62.592	1.25915
62.838	1.26999
63.085	1.28037
63.331	1.26858
63.578	1.29189
63.824	1.26443
64.071	1.27017
64.317	1.26208
64.564	1.28843
64.81	1.31208
65.057	1.33956
65.303	1.36232
65.55	1.41799
65.796	1.47365
66.043	1.54746
66.289	1.57845
66.536	1.6383
66.782	1.71991
67.029	1.78032
67.275	1.88349
67.522	1.96851
67.768	2.02041
68.014	2.09278
68.261	2.15147
68.507	2.18133
68.754	2.23257
69	2.24081
69.247	2.20861
69.493	2.18172
69.74	2.13085
69.986	2.07654
70.233	2.00241
70.479	1.95262
70.726	1.89886
70.972	1.78887
71.219	1.70978
71.465	1.66158
71.712	1.60844
71.958	1.57828
72.205	1.5343
72.451	1.51103
72.698	1.49893
72.944	1.52248
73.191	1.56868
73.437	1.66713
73.684	1.82634
73.93	2.06735
74.177	2.40238
74.423	2.90883
74.67	3.59522
74.916	4.54035
75.162	5.75069
75.409	7.31477
75.655	9.25243
75.902	11.5189
76.148	14.0235
76.395	16.6411
76.641	19.1789
76.888	21.4541
77.134	23.3482
77.381	24.7163
77.627	25.5065
77.874	25.7026
78.12	25.3574
78.367	24.4968
78.613	23.2255
78.86	21.6409
79.106	19.8186
79.353	17.8895
79.599	15.9014
79.846	13.9362
80.092	12.056
80.339	10.2952
80.585	8.69992
80.832	7.27465
81.078	6.04279
81.325	4.99662
81.571	4.12693
81.818	3.39789
82.064	2.83834
82.31	2.3895
82.557	2.04383
82.803	1.76444
83.05	1.57219
83.296	1.4009
83.543	1.33014
83.789	1.25826
84.036	1.21463
84.282	1.18379
84.529	1.16271
84.775	1.15227
85.022	1.13008
85.268	1.1338
85.515	1.13378
85.761	1.10674
86.008	1.09484
86.254	1.08994
86.501	1.09046
86.747	1.09295
86.994	1.06127
87.24	1.06079
87.487	1.04988
87.733	1.05469
87.98	1.02685
88.226	1.04169
88.473	1.03864
88.719	1.01904
88.966	1.00874
89.212	1.02203
89.458	1.01081
89.705	0.9887
89.951	0.981437
90.198	0.992258
90.444	0.979492
90.691	0.97664
90.937	0.983581
91.184	0.964801
91.43	0.954567
91.677	0.94217
91.923	0.963106
92.17	0.973564
92.416	0.957839
92.663	0.951818
92.909	0.940527
93.156	0.955311
93.402	0.949222
93.649	0.937761
93.895	0.941253
94.142	0.936831
94.388	0.949034
94.635	0.948009
94.881	0.944256
95.128	0.930136
95.374	0.935446
95.621	0.93422
95.867	0.966318
96.114	0.957593
96.36	0.948367
96.606	0.949744
96.853	0.951399
97.099	0.962024
97.346	0.97268
97.592	0.956116
97.839	0.968224
98.085	0.990214
98.332	0.97055
98.578	0.961121
98.825	0.966664
99.071	0.970974
99.318	0.948981
99.564	0.95867
99.811	0.958844

## Sheet: Figure 1f
Figure 1f
GST pull-down indicates that CD28H does not form oligomers.

## Sheet: Figure 1g (top panel)
Figure 1g
circular dichroism (CD)
	25	30	35	40	45	50	55	60	65	70	75	80	Temperature		25	30	35	40	45	50	55	60	65	70	75	80
Wavelength (nm)	CD [mdeg]	CD [mdeg]	CD [mdeg]	CD [mdeg]	CD [mdeg]	CD [mdeg]	CD [mdeg]	CD [mdeg]	CD [mdeg]	CD [mdeg]	CD [mdeg]	CD [mdeg]		Wavelength (nm)	Molar ellipticity [θ]	Molar ellipticity [θ]	Molar ellipticity [θ]	Molar ellipticity [θ]	Molar ellipticity [θ]	Molar ellipticity [θ]	Molar ellipticity [θ]	Molar ellipticity [θ]	Molar ellipticity [θ]	Molar ellipticity [θ]	Molar ellipticity [θ]	Molar ellipticity [θ]
240	-0.70345	-0.832142	-0.873988	-1.00135	-0.975004	-1.06145	-1.1184	-1.29684	-1.3021	-1.43036	-1.46093	-1.46093		240	-23448.3	-27738.1	-29132.9	-33378.3	-32500.1	-35381.7	-37280	-43228	-43403.3	-47678.7	-48697.7	-48697.7
239	-0.836895	-1.01034	-1.09523	-1.16365	-1.14969	-1.2311	-1.34776	-1.53941	-1.51804	-1.66437	-1.68175	-1.68175		239	-27896.5	-33678	-36507.7	-38788.3	-38323	-41036.7	-44925.3	-51313.7	-50601.3	-55479	-56058.3	-56058.3
238	-1.02194	-1.17512	-1.28605	-1.38549	-1.34226	-1.42303	-1.55079	-1.74198	-1.72259	-1.92096	-1.92031	-1.92031		238	-34064.7	-39170.7	-42868.3	-46183	-44742	-47434.3	-51693	-58066	-57419.7	-64032	-64010.3	-64010.3
237	-1.19908	-1.3453	-1.46775	-1.57339	-1.59469	-1.66359	-1.79373	-1.98778	-2.02161	-2.19841	-2.19596	-2.19596		237	-39969.3	-44843.3	-48925	-52446.3	-53156.3	-55453	-59791	-66259.3	-67387	-73280.3	-73198.7	-73198.7
236	-1.38308	-1.51486	-1.66573	-1.76188	-1.82564	-1.89392	-2.08268	-2.23959	-2.28306	-2.47647	-2.47731	-2.47731		236	-46102.7	-50495.3	-55524.3	-58729.3	-60854.7	-63130.7	-69422.7	-74653	-76102	-82549	-82577	-82577
235	-1.61649	-1.70445	-1.88479	-1.98134	-2.08805	-2.15178	-2.38163	-2.49305	-2.58878	-2.76851	-2.81534	-2.81534		235	-53883	-56815	-62826.3	-66044.7	-69601.7	-71726	-79387.7	-83101.7	-86292.7	-92283.7	-93844.7	-93844.7
234	-1.78326	-1.91073	-2.09323	-2.19184	-2.32224	-2.45574	-2.6381	-2.83063	-2.92968	-3.08089	-3.11565	-3.11565		234	-59442	-63691	-69774.3	-73061.3	-77408	-81858	-87936.7	-94354.3	-97656	-102696	-103855	-103855
233	-1.93598	-2.07579	-2.25722	-2.35961	-2.52237	-2.66564	-2.86027	-3.07296	-3.18117	-3.30241	-3.34433	-3.34433		233	-64532.7	-69193	-75240.7	-78653.7	-84079	-88854.7	-95342.3	-102432	-106039	-110080	-111478	-111478
232	-2.12442	-2.28253	-2.45663	-2.58029	-2.80824	-2.94202	-3.12965	-3.3865	-3.51909	-3.61224	-3.69217	-3.69217		232	-70814	-76084.3	-81887.7	-86009.7	-93608	-98067.3	-104322	-112883	-117303	-120408	-123072	-123072
231	-2.3474	-2.51905	-2.74098	-2.85221	-3.07969	-3.26253	-3.41934	-3.69066	-3.82932	-3.94715	-4.06962	-4.06962		231	-78246.7	-83968.3	-91366	-95073.7	-102656	-108751	-113978	-123022	-127644	-131572	-135654	-135654
230	-2.58117	-2.79609	-3.02416	-3.15384	-3.35878	-3.59709	-3.71461	-3.99758	-4.20706	-4.28079	-4.38835	-4.38835		230	-86039	-93203	-100805	-105128	-111959	-119903	-123820	-133253	-140235	-142693	-146278	-146278
229	-2.84482	-3.08239	-3.33101	-3.45397	-3.68702	-3.91862	-4.0519	-4.34375	-4.54031	-4.64141	-4.75853	-4.75853		229	-94827.3	-102746	-111034	-115132	-122901	-130621	-135063	-144792	-151344	-154714	-158618	-158618
228	-3.1068	-3.39416	-3.61612	-3.74005	-4.01622	-4.20142	-4.35867	-4.63101	-4.88364	-4.99754	-5.11029	-5.11029		228	-103560	-113139	-120537	-124668	-133874	-140047	-145289	-154367	-162788	-166585	-170343	-170343
227	-3.42328	-3.71138	-3.94602	-4.09063	-4.29918	-4.56835	-4.71563	-4.92477	-5.22461	-5.3509	-5.46438	-5.46438		227	-114109	-123713	-131534	-136354	-143306	-152278	-157188	-164159	-174154	-178363	-182146	-182146
226	-3.75691	-4.06001	-4.24576	-4.41521	-4.62052	-4.91208	-5.03964	-5.32099	-5.59832	-5.70349	-5.8073	-5.8073		226	-125230	-135334	-141525	-147174	-154017	-163736	-167988	-177366	-186611	-190116	-193577	-193577
225	-4.0951	-4.38279	-4.55107	-4.8035	-5.00551	-5.2696	-5.42239	-5.7059	-5.9316	-6.06135	-6.13074	-6.13074		225	-136503	-146093	-151702	-160117	-166850	-175653	-180746	-190197	-197720	-202045	-204358	-204358
224	-4.47369	-4.76334	-4.89672	-5.15732	-5.41431	-5.63374	-5.80325	-6.08984	-6.29738	-6.40584	-6.48805	-6.48805		224	-149123	-158778	-163224	-171911	-180477	-187791	-193442	-202995	-209913	-213528	-216268	-216268
223	-4.86548	-5.11687	-5.30169	-5.54379	-5.81357	-6.02171	-6.1864	-6.45914	-6.64295	-6.78117	-6.81846	-6.81846		223	-162183	-170562	-176723	-184793	-193786	-200724	-206213	-215305	-221432	-226039	-227282	-227282
222	-5.28256	-5.47716	-5.69473	-5.95905	-6.26572	-6.46211	-6.62377	-6.8927	-7.01981	-7.13141	-7.1915	-7.1915		222	-176085	-182572	-189824	-198635	-208857	-215404	-220792	-229757	-233994	-237714	-239717	-239717
221	-5.70354	-5.9384	-6.16612	-6.41905	-6.72843	-6.8922	-7.03847	-7.24106	-7.44571	-7.52285	-7.55888	-7.55888		221	-190118	-197947	-205537	-213968	-224281	-229740	-234616	-241369	-248190	-250762	-251963	-251963
220	-6.26291	-6.43491	-6.6854	-6.87128	-7.17412	-7.3853	-7.45255	-7.64805	-7.90806	-7.9529	-7.97805	-7.97805		220	-208764	-214497	-222847	-229043	-239137	-246177	-248418	-254935	-263602	-265097	-265935	-265935
219	-6.85855	-7.00575	-7.25744	-7.43775	-7.71965	-7.91498	-7.96478	-8.08187	-8.37656	-8.4315	-8.35129	-8.35129		219	-228618	-233525	-241915	-247925	-257322	-263833	-265493	-269396	-279219	-281050	-278376	-278376
218	-7.39818	-7.61069	-7.71928	-7.94292	-8.209	-8.38103	-8.45587	-8.556	-8.79791	-8.8243	-8.74851	-8.74851		218	-246606	-253690	-257309	-264764	-273633	-279368	-281862	-285200	-293264	-294143	-291617	-291617
217	-8.00155	-8.27029	-8.27582	-8.52223	-8.76204	-8.85559	-9.00157	-9.04057	-9.26764	-9.30481	-9.14359	-9.14359		217	-266718	-275676	-275861	-284074	-292068	-295186	-300052	-301352	-308921	-310160	-304786	-304786
216	-8.69229	-8.89571	-8.88327	-9.07101	-9.28324	-9.36363	-9.58635	-9.55222	-9.70116	-9.70142	-9.57145	-9.57145		216	-289743	-296524	-296109	-302367	-309441	-312121	-319545	-318407	-323372	-323381	-319048	-319048
215	-9.37796	-9.59267	-9.53309	-9.70238	-9.86404	-9.91125	-10.1431	-10.1029	-10.2117	-10.225	-10.0614	-10.0614		215	-312599	-319756	-317770	-323413	-328801	-330375	-338103	-336763	-340390	-340833	-335380	-335380
214	-10.1131	-10.2791	-10.2225	-10.3053	-10.5566	-10.4924	-10.6996	-10.6702	-10.7746	-10.7258	-10.5727	-10.5727		214	-337103	-342637	-340750	-343510	-351887	-349747	-356653	-355673	-359153	-357527	-352423	-352423
213	-10.9674	-11.0601	-11.0014	-11.1051	-11.2665	-11.1496	-11.3588	-11.2789	-11.3589	-11.2684	-11.1153	-11.1153		213	-365580	-368670	-366713	-370170	-375550	-371653	-378627	-375963	-378630	-375613	-370510	-370510
212	-11.901	-11.8757	-11.8421	-11.9871	-11.9285	-11.9295	-12.053	-11.9629	-12.0188	-11.8473	-11.7501	-11.7501		212	-396700	-395857	-394737	-399570	-397617	-397650	-401767	-398763	-400627	-394910	-391670	-391670
211	-12.9314	-12.8858	-12.8214	-12.9079	-12.8315	-12.7704	-12.8509	-12.7514	-12.7779	-12.5486	-12.4157	-12.4157		211	-431047	-429527	-427380	-430263	-427717	-425680	-428363	-425047	-425930	-418287	-413857	-413857
210	-14.0619	-13.9261	-13.8238	-13.9193	-13.885	-13.704	-13.6626	-13.5816	-13.5797	-13.3258	-13.117	-13.117		210	-468730	-464203	-460793	-463977	-462833	-456800	-455420	-452720	-452657	-444193	-437233	-437233
209	-15.2499	-15.0915	-14.9198	-15.0522	-14.8847	-14.7094	-14.6307	-14.481	-14.4635	-14.1573	-13.8613	-13.8613		209	-508330	-503050	-497327	-501740	-496157	-490313	-487690	-482700	-482117	-471910	-462043	-462043
208	-16.5968	-16.3757	-16.1528	-16.1675	-16.012	-15.8558	-15.674	-15.5146	-15.4279	-15.1695	-14.7323	-14.7323		208	-553227	-545857	-538427	-538917	-533733	-528527	-522467	-517153	-514263	-505650	-491077	-491077
207	-17.9164	-17.7917	-17.4216	-17.3858	-17.2177	-17.0484	-16.6798	-16.5206	-16.4535	-16.1179	-15.6567	-15.6567		207	-597213	-593057	-580720	-579527	-573923	-568280	-555993	-550687	-548450	-537263	-521890	-521890
206	-19.2171	-19.0479	-18.6496	-18.5281	-18.2625	-18.1119	-17.6773	-17.5271	-17.4327	-17.0397	-16.4578	-16.4578		206	-640570	-634930	-621653	-617603	-608750	-603730	-589243	-584237	-581090	-567990	-548593	-548593
205	-20.5857	-20.3313	-19.9402	-19.6841	-19.366	-19.2855	-18.7081	-18.539	-18.3491	-17.9131	-17.3112	-17.3112		205	-686190	-677710	-664673	-656137	-645533	-642850	-623603	-617967	-611637	-597103	-577040	-577040
204	-21.9204	-21.5413	-21.1043	-20.6474	-20.369	-20.3068	-19.5286	-19.3339	-19.1758	-18.6415	-17.9937	-17.9937		204	-730680	-718043	-703477	-688247	-678967	-676893	-650953	-644463	-639193	-621383	-599790	-599790
203	-22.95	-22.5343	-22.0665	-21.5184	-21.1752	-21.002	-20.2595	-19.9493	-19.699	-19.0136	-18.485	-18.485		203	-765000	-751143	-735550	-717280	-705840	-700067	-675317	-664977	-656633	-633787	-616167	-616167
202	-23.7862	-23.2084	-22.7163	-22.1012	-21.644	-21.4052	-20.6197	-20.3381	-20.0061	-19.3411	-18.7166	-18.7166		202	-792873	-773613	-757210	-736707	-721467	-713507	-687323	-677937	-666870	-644703	-623887	-623887
201	-24.3148	-23.683	-23.0862	-22.4828	-22.0924	-21.5326	-20.7551	-20.4001	-19.887	-19.3346	-18.6663	-18.6663		201	-810493	-789433	-769540	-749427	-736413	-717753	-691837	-680003	-662900	-644487	-622210	-622210
200	-24.5015	-23.9717	-23.0937	-22.4972	-22.0779	-21.3114	-20.5629	-20.1952	-19.6106	-19.0271	-18.3678	-18.3678		200	-816717	-799057	-769790	-749907	-735930	-710380	-685430	-673173	-653687	-634237	-612260	-612260
199	-24.1002	-23.6712	-22.7176	-22.1627	-21.5764	-20.5642	-19.9492	-19.5086	-18.7446	-18.2678	-17.772	-17.772		199	-803340	-789040	-757253	-738757	-719213	-685473	-664973	-650287	-624820	-608927	-592400	-592400
198	-23.4923	-22.7718	-21.9581	-21.3303	-20.725	-19.6548	-18.8284	-18.4909	-17.7389	-17.1641	-16.7412	-16.7412		198	-783077	-759060	-731937	-711010	-690833	-655160	-627613	-616363	-591297	-572137	-558040	-558040
197	-22.0491	-21.3904	-20.5174	-19.879	-19.2313	-18.0194	-17.4959	-16.6185	-16.1513	-15.3623	-15.4017	-15.4017		197	-734970	-713013	-683913	-662633	-641043	-600647	-583197	-553950	-538377	-512077	-513390	-513390
196	-20.4041	-19.7058	-18.8216	-18.0639	-17.5744	-16.2185	-15.7615	-14.8014	-14.7308	-13.7544	-13.5522	-13.5522		196	-680137	-656860	-627387	-602130	-585813	-540617	-525383	-493380	-491027	-458480	-451740	-451740
195	-18.2992	-17.4075	-16.728	-15.6579	-15.3962	-14.1728	-13.7818	-12.5273	-12.4012	-11.6284	-11.3251	-11.3251		195	-609973	-580250	-557600	-521930	-513207	-472427	-459393	-417577	-413373	-387613	-377503	-377503
194	-15.7698	-15.0132	-14.2683	-13.3169	-12.8577	-11.7489	-11.4455	-10.2025	-9.41969	-9.13402	-9.11524	-9.11524		194	-525660	-500440	-475610	-443897	-428590	-391630	-381517	-340083	-313990	-304467	-303841	-303841
193	-12.7917	-12.3593	-11.7481	-10.8869	-10.0989	-9.17503	-8.98985	-7.81066	-7.21499	-6.7208	-6.39714	-6.39714		193	-426390	-411977	-391603	-362897	-336630	-305834	-299662	-260355	-240500	-224027	-213238	-213238
192	-10.1676	-9.59559	-9.23459	-8.71256	-7.85338	-7.04204	-7.63061	-5.89575	-4.52853	-4.73223	-5.10528	-5.10528		192	-338920	-319853	-307820	-290419	-261779	-234735	-254354	-196525	-150951	-157741	-170176	-170176
191	-7.30947	-6.75034	-6.62607	-6.5005	-6.29755	-5.29813	-6.1287	-5.03759	-3.06109	-3.36931	-3.8416	-3.8416		191	-243649	-225011	-220869	-216683	-209918	-176604	-204290	-167920	-102036	-112310	-128053	-128053
190	-5.21216	-4.63121	-4.79999	-5.52407	-5.48744	-4.30634	-4.85587	-4.67422	-3.54671	-3.11235	-3.99869	-3.99869		190	-173739	-154374	-160000	-184136	-182915	-143545	-161862	-155807	-118224	-103745	-133290	-133290

## Sheet: Figure 1g (bottom panel)
Figure 1g
circular dichroism (CD)
Temperature	25	30	35	40	45	50	55	60	65	70	75	80	85
[θ] at 196 nm (deg⋅cm2⋅dmol-1)	-680137	-656860	-627387	-602130	-585813	-540617	-525383	-493380	-491027	-458480	-451740	-451740	-373407

## Sheet: Figure 2d
Figure 2d
Pro	Cb	Cg	delta	isomer
119	30.516	27.176	3.34	t
120	30.718	27.142	3.576	t
121	31.858	27.018	4.84	t
142	31.952	27.055	4.897	t
144	31.696	27.167	4.529	t
147	31.822	26.817	5.005	t
149	32.112	27.035	5.077	t
152	31.181	26.186	4.995	t
219	32.18	24.188	7.992	c
220	30.182	27.185	2.997	t
221	30.911	26.311	4.6	t
247	33.824	24.482	9.342	c
249	34.689	24.523	10.166	c
252	33.858	24.356	9.502	c
319	31.024	30.516	0.508	t
320	32.18	24.188	7.992	c
321	34.06	24.356	9.704	c
347	33.036	23.637	9.399	c
349	31.088	26.409	4.679	t

## Sheet: Figure 3a
Figure 3a
Far-UV circular dichroism spectra of experimental (green) and reconstructed (blue) data for CD28H from 190 – 240 nm wavelength
CD [mdeg]	Wavelength (nm)	Molar ellipticity [θ] from experimental data	Molar ellipticity [θ] from reconstructed data
-0.804167	190	-2785.49	-1879.86
-2.09525	191	-4841.46	-4881.04
-3.13853	192	-6938.99	-7321.56
-3.99482	193	-8993.65	-9333.34
-4.77133	194	-10916.4	-11114.3
-5.44504	195	-12608.2	-12697.3
-6.05865	196	-14072.6	-14115.4
-6.55441	197	-15207.1	-15302.7
-6.95468	198	-16021.7	-16226.2
-7.21289	199	-16523	-16819.8
-7.30701	200	-16730.8	-17050.7
-7.24248	201	-16717.6	-16885.8
-7.11559	202	-16503.2	-16588.9
-6.91096	203	-16071.1	-16127.2
-6.59592	204	-15487.4	-15368.7
-6.2248	205	-14748.7	-14511.2
-5.81292	206	-13887.9	-13554.8
-5.41762	207	-12994.1	-12631.3
-5.04875	208	-12017.9	-11773.9
-4.68331	209	-11054.9	-10916.4
-4.3445	210	-10128.2	-10124.9
-4.05056	211	-9290.47	-9465.26
-3.77132	212	-8548.42	-8805.66
-3.49739	213	-7944.88	-8146.06
-3.22544	214	-7351.24	-7519.44
-2.98668	215	-6826.86	-6958.78
-2.78775	216	-6325.56	-6497.06
-2.57623	217	-5906.72	-6002.36
-2.36009	218	-5464.79	-5507.66
-2.1948	219	-5029.45	-5111.9
-2.06153	220	-4577.62	-4815.08
-1.9187	221	-4132.39	-4485.28
-1.78365	222	-3700.36	-4155.48
-1.65297	223	-3363.96	-3858.66
-1.52967	224	-3047.02	-3561.84
-1.39653	225	-2815.5	-3265.02
-1.29409	226	-2671.71	-3034.16
-1.20807	227	-2605.09	-2803.3
-1.12425	228	-2606.74	-2638.4
-1.00789	229	-2658.19	-2341.58
-0.939662	230	-2683.58	-2209.66
-0.859707	231	-2630.15	-2011.78
-0.79037	232	-2399.29	-1846.88
-0.703904	233	-2083.68	-1649
-0.655935	234	-1734.75	-1517.08
-0.6082	235	-1425.07	-1418.14
-0.538983	236	-1230.15	-1253.24
-0.472944	237	-1120.99	-1088.34
-0.411194	238	-1029.97	-956.42
-0.379044	239	-950.48	-890.46
-0.332238	240	-863.75	-758.54

## Sheet: Figure 4a (top panel)
Figure 4a (top panel)			Ramachandran plot of residues D124 – E126.
Model11,23	f	y									all others	f	y
ASP-124	-128	-28.7									ASP-124	-60.4	-38.9
ASN-125	-61.9	-39.9									ASN-125	-71.6	-7.6
GLU-126	-61.9	-43.2									GLU-126	-60.8	-39.7
LYS-127	-91.2	76									LYS-127	-59.9	-28.1
SER-128	-164.7	-42									SER-128	-63.1	-39.9
ASP-124	35.4	-87.9									ASP-124	-59.1	-19.8
ASN-125	-57.6	-15.8									ASN-125	-61.6	-13.1
GLU-126	-60	-41.8									GLU-126	-59.4	-38.7
LYS-127	34	-89.5									LYS-127	-59.4	-29.3
SER-128	-117	83									SER-128	-74.4	-11
											ASP-124	-64.7	-22.2
											ASN-125	-59.4	-37.3
											GLU-126	-57.5	-21
											LYS-127	60.1	52.3
											SER-128	49.9	47
											ASP-124	-62.8	-23.1
											ASN-125	-60.3	-37.6
											GLU-126	-54.6	-25.6
											LYS-127	-56.1	-30.6
											SER-128	-112.7	-20.5
											ASP-124	60.4	9.9
											ASN-125	-100	-20.1
											GLU-126	-63.2	-38.9
											LYS-127	-60.3	-19.4
											SER-128	-62.2	-39.5
											ASP-124	-66	-36.5
											ASN-125	-57.6	-20.2
											GLU-126	-61.3	-41.3
											LYS-127	-63.7	-38.6
											SER-128	-95	14.1
											ASP-124	59.1	13.1
											ASN-125	-107.5	-15.3
											GLU-126	-61.5	-39.6
											LYS-127	-62.5	-39.8
											SER-128	-61.5	-42.8
											ASP-124	-60.9	-38.3
											ASN-125	-66.2	-13.4
											GLU-126	-60.5	-40.7
											LYS-127	-61	-28.5
											SER-128	-153	80.2
											ASP-124	-62	-37.8
											ASN-125	-57.9	-16.6
											GLU-126	-61.4	-37.5
											LYS-127	-156.5	-34.6
											SER-128	-61.2	-39.6
											ASP-124	-66	-13.5
											ASN-125	-69.1	-9.5
											GLU-126	-53.3	-32.7
											LYS-127	52.2	24.2
											SER-128	-104.6	-17
											ASP-124	-70.4	-13.1
											ASN-125	-79.5	0.5
											GLU-126	-53.9	-37.7
											LYS-127	-61.5	-26.5
											SER-128	-100.8	13.4
											ASP-124	59.2	10.2
											ASN-125	-91.2	-11.1
											GLU-126	-61.4	-40.1
											LYS-127	-63.9	-16.7
											SER-128	-60.3	-39.2
											ASP-124	61	-85.5
											ASN-125	-127.4	11.7
											GLU-126	-62.4	-37.1
											LYS-127	-63	-26.9
											SER-128	-62.3	-39.9
											ASP-124	-60.4	-18.4
											ASN-125	-54.4	-26.4
											GLU-126	-62.8	-38.1
											LYS-127	-82.2	1
											SER-128	73.2	36.5
											ASP-124	-58.1	-35.5
											ASN-125	-60.3	-38.6
											GLU-126	-59.5	-46.5
											LYS-127	31.2	-88.7
											SER-128	-150.2	20.3
											ASP-124	-69.3	-11
											ASN-125	-63.9	-18.8
											GLU-126	-58.1	-34.8
											LYS-127	56.6	29.4
											SER-128	49.3	36.2
											ASP-124	-163.4	-33.7
											ASN-125	-70.4	-10.8
											GLU-126	-60.3	-39.7
											LYS-127	-60.2	-28.5
											SER-128	-63.1	-39.8
											ASP-124	-60.4	-38.1
											ASN-125	-67.4	-9.6
											GLU-126	-59.3	-37
											LYS-127	54.9	31.8
											SER-128	52.6	40.9
											ASP-124	59.4	11.2
											ASN-125	-101.3	-21.3
											GLU-126	-62.4	-38.9
											LYS-127	-59.9	-18.4
											SER-128	-64.2	-22.1
											ASP-124	62	4.8
											ASN-125	-74.7	-32.2
											GLU-126	-64.1	-38.8
											LYS-127	-82.8	-4.6
											SER-128	-60	-39.4
											ASP-124	-63.5	-23.4
											ASN-125	-62.9	-20.6
											GLU-126	-60	-41.3
											LYS-127	-59	-29
											SER-128	-151	79.2
											ASP-124	-60.6	-36.6
											ASN-125	-60	-39.9
											GLU-126	-61.7	-43.5
											LYS-127	-93.5	15.3
											SER-128	-62.4	-23.8
											ASP-124	-66	-13.5
											ASN-125	-69.1	-9.5
											GLU-126	-53.3	-32.7
											LYS-127	52.2	24.2
											SER-128	-104.6	-17

## Sheet: Figure 4a (bottom panel)
Figure 4a (bottom panel)		Ramachandran plot of residues P119 – P121, P142, P144, P147, and P149
P119-121	f	y								P142,144,147,149	f	y
PRO-119	-75.5	162.9								PRO-142	-57.3	142.6
PRO-120	-56.2	143.1								PRO-144	-64.1	-30.2
PRO-121	-74.7	148.8								PRO-147	-59.4	137
PRO-119	-73.8	159.7								PRO-149	-58.2	142
PRO-120	-69.6	156.1								PRO-142	-71.1	152.4
PRO-121	-79.5	155.9								PRO-144	-70.7	-33.6
PRO-119	-71.3	157.1								PRO-147	-62.1	141.8
PRO-120	-70.6	157.9								PRO-149	-58.5	142.7
PRO-121	-72.6	162.9								PRO-142	-56.4	142.3
PRO-119	-70.7	160.8								PRO-144	-84.9	-47.3
PRO-120	-57.1	148.6								PRO-147	-60	142.7
PRO-121	-73.9	171.2								PRO-149	-58.5	143.2
PRO-119	-59.5	150.7								PRO-142	-61.6	141
PRO-120	-69.6	155.9								PRO-144	-68.7	-91.7
PRO-121	-79.2	154.9								PRO-147	-68.1	163
PRO-119	-71.3	158.4								PRO-149	-69.2	152.8
PRO-120	-70.6	157.5								PRO-142	-71	152.9
PRO-121	-77.8	161.1								PRO-144	-84.8	-48
PRO-119	-84.5	129.4								PRO-147	-60.4	142.4
PRO-120	-73.1	159.9								PRO-149	-70.4	153.1
PRO-121	-73.8	168.5								PRO-142	-70.5	149.7
PRO-119	-71.3	159.3								PRO-144	-67.2	-153.8
PRO-120	-57.6	148.7								PRO-147	-61.6	146.4
PRO-121	-70.8	161.3								PRO-149	-57.9	142
PRO-119	-58.2	150.9								PRO-142	-70.6	150.8
PRO-120	-69.1	157.2								PRO-144	-56.1	-41.5
PRO-121	-78.1	156.2								PRO-147	-60.1	138.1
PRO-119	-54.8	150.5								PRO-149	-58.4	143.5
PRO-120	-67.5	153.1								PRO-142	-70	153.2
PRO-121	-77.5	147.9								PRO-144	-70.5	-92.8
PRO-119	-73.3	160.2								PRO-147	-65.3	159.6
PRO-120	-70	157.3								PRO-149	-68.9	150.2
PRO-121	-74.2	171.8								PRO-142	-57.6	143.2
PRO-119	-73.4	155.6								PRO-144	-85	-47.1
PRO-120	-72.3	156.7								PRO-147	-60.3	142.2
PRO-121	-72	160.6								PRO-149	-70.3	152.8
PRO-119	-58.7	149.5								PRO-142	-57.7	143.3
PRO-120	-70.6	157.7								PRO-144	-66.2	-29
PRO-121	-79.5	174.4								PRO-147	-59.3	138.5
PRO-119	-71.7	157.4								PRO-149	-58.8	144.3
PRO-120	-71	156.8								PRO-142	-70.4	152.6
PRO-121	-80.3	174.4								PRO-144	-69.5	-35.1
PRO-119	-58.4	151.4								PRO-147	-60.7	140.3
PRO-120	-70.1	161.6								PRO-149	-58.7	141.8
PRO-121	-79.9	174.5								PRO-142	-72.1	158.3
PRO-119	-69.9	157.1								PRO-144	-79.1	-82.8
PRO-120	-70.8	158.7								PRO-147	-61.5	147.3
PRO-121	-70.9	162.2								PRO-149	-57.8	140.1
PRO-119	-59	151.2								PRO-142	-59.1	143
PRO-120	-57.1	149.6								PRO-144	-81.9	-93.2
PRO-121	-70.2	160.7								PRO-147	-56.7	129.4
PRO-119	-70.6	156.7								PRO-149	-58.2	142.1
PRO-120	-71.3	158.3								PRO-142	-71.3	153.4
PRO-121	-71.3	164								PRO-144	-84.7	-47.5
PRO-119	-58.2	150.6								PRO-147	-60.4	144.4
PRO-120	-56.9	148.7								PRO-149	-56	140.9
PRO-121	-73.4	170.4								PRO-142	-70.7	152.6
PRO-119	-72.2	159.1								PRO-144	-70.5	-33.3
PRO-120	-58	148.5								PRO-147	-60.5	140.5
PRO-121	-70.8	163.4								PRO-149	-58	142.2
PRO-119	-72.4	162								PRO-142	-57	142.1
PRO-120	-57.4	149.6								PRO-144	-67.6	-30.4
PRO-121	-77.1	161.4								PRO-147	-59.8	139.7
PRO-119	-72.7	157.6								PRO-149	-70.1	153.6
PRO-120	-71.3	157.8								PRO-142	-72.1	153
PRO-121	-77.8	155.8								PRO-144	-68.1	-156
PRO-119	-73.9	160.6								PRO-147	-63.6	138.1
PRO-120	-58.6	150								PRO-149	-58.2	144.5
PRO-121	-77.9	174								PRO-142	-70.3	152.8
PRO-119	-59	152								PRO-144	-71.2	-52
PRO-120	-58.1	153								PRO-147	-59.5	146.9
PRO-121	-69.6	161.2								PRO-149	-58.2	142.4
PRO-119	-73.3	160.2								PRO-142	-59	144.7
PRO-120	-70	157.3								PRO-144	-64.7	-28.3
PRO-121	-74.2	171.8								PRO-147	-59.8	135.7
										PRO-149	-58.3	142.5
										PRO-142	-59.2	144.3
										PRO-144	-54.8	-40.2
										PRO-147	-58.2	134.3
										PRO-149	-70.2	153.1
										PRO-142	-71.5	152.5
										PRO-144	-80.4	-79.2
										PRO-147	-66	153.8
										PRO-149	-70	150.8
										PRO-142	-69.3	155.1
										PRO-144	-83.8	-49.5
										PRO-147	-59.9	142.3
										PRO-149	-71.6	152.8
										PRO-142	-56.6	141.4
										PRO-144	-65.3	-28.9
										PRO-147	-57.8	133.6
										PRO-149	-58.7	142.8
										PRO-142	-70	151.6
										PRO-144	-79.7	-52.3
										PRO-147	-61.8	148.2
										PRO-149	-69.6	151.5
										PRO-142	-70.4	152.6
										PRO-144	-69.5	-35.1
										PRO-147	-60.7	140.3
										PRO-149	-58.7	141.8

## Sheet: Figure 4c
Figure 4c		Chemical shift index comparison for proline Ca atoms in CD28H compared to those in random coil structures.
	Residue #	Ca CSI
P	119	-1.84
P	120	-3.529
P	121	-1.898
P	142	0.411
P	144	0.091
P	147	0.189
P	149	0.074
P	152	1.736

## Sheet: Figure 6b
Figure 6b			Ca chemical shift index of the major conformational state of CD28H
			Expt Ca		random coil Ca		CSI (Expt-random+adjust2011)
	114	I	61.077		62.6		-1.393						#VALUE!
	115	E	56.331		56.7		-0.429
	116	V	62.044		63		-1.026
	117	M	55.025		56.6		-1.545
	118	Y	55.293		58.6		-3.067
	119	P	61.07		62.9		-1.84
	120	P	61.281		62.9		-3.529
	121	P	62.992		62.9		-1.898
	122	Y	57.444		58.6		-3.206
	123	L	54.608		55.7		-1.122
	124	D	54.249		54.1		0.369
	125	N	53.533		53.6		0.143
	126	E	57.109		56.7		0.479
	127	K	56.375		56.7		-0.095
	128	S	58.291		58.3		0.251
	129	N	53.28		53.6		-0.26
	130	G	45.364		45		0.624
	131	T	62.109		63.1		-0.891
	132	I	60.868		62.6		-1.622
	133	I	60.549		62.6		-2.081
	134	H	55.6		55.8		-0.32
	135	V	62.129		63		-0.901
	136	K	56.475		56.7		-0.315
	137	G	45.015		45		-0.025
	138	K	56.14		56.7		-0.38
	139	H	55.727		55.8		-0.013
	140	L	54.758		55.7		-0.752
	141	C	56.269		58		-1.711
	142	P	63.071		62.9		0.411
	143	S	56.214		58.3		-3.926
	144	P	63.101		62.9		0.091
	145	L	55.054		55.7		-2.396
	146	F	55.036		57.9		-3.014
	147	P	63.139		62.9		0.189
	148	G	44.264		45		-2.636
	149	P	62.894		62.9		0.074
	150	S	58.236		58.3		-1.894
	151	K	53.855		56.7		-2.975
	152	P	64.596		62.9		1.736

[truncated: 3 more sheets: Figure 6c, Figure 6d, Supplementary Figure 1]
